# Supplementary material for: Oscillations of Delta-like1 regulate the balance between differentiation and maintenance of muscle stem cells
Source: PubMed Central journal article supplement (PMC7910593; doi:10.1038/s41467-021-21631-4), 2021-02-26
Supplement: 41467_2021_21631_MOESM9_ESM.pdf [file 41467_2021_21631_MOESM9_ESM.pdf]

**Title:** Supplementary Movie 1.

**Description:** Dll1-luciferase expression in a single muscle stem cell associated with a myofiber, related to Fig. 2a. The fiber was isolated from a mouse carrying the Dll1<sup>luc</sup> indicator allele. Time-lapse imaging of bioluminescence (left) and bright field (right) signals. Images were taken every 10 minutes; the exposure time for the bioluminescence signal was 6 minutes, and for the bright field image 30 milliseconds.

**Title:** Supplementary Movie 2.

**Description:** Dll1-luciferase expression in coupled muscle stem cells associated with a myofiber, related to Fig. 2b. The fiber was isolated from a mouse carrying the Dll1<sup>luc</sup> indicator allele. Time-lapse imaging of bioluminescence (left) and bright field (right) signals. The arrows (green) show the cells that were tracked. Images were taken every 10 minutes; the exposure time for the bioluminescence signal was 6 minutes, and for the bright field image 30 milliseconds.

**Title:** Supplementary Movie 3.

**Description:** Nanoluc expression in a sphere formed by wildtype muscle stem cells, related to Fig. 2c. Time-lapse imaging of bioluminescence (left) and bright field and GFP (right) signals. Images were taken every 10 minutes; the exposure time for the bioluminescence signal was 5 minutes, and for the bright field image 30 milliseconds.

**Title:** Supplementary Movie 4.

**Description:** Dll1-luciferase expression in a single muscle stem cell associated with a myofiber, related to Fig. 6b. The fiber was isolated from a TxDll1<sup>f/type2</sup> mouse. Time-lapse imaging of bioluminescence (left) and bright field (right) signals. Images were taken every 10 minutes; the exposure time for the bioluminescence signal was 9 minutes, and for the bright field image 30 milliseconds.

**Title:** Supplementary Movie 5.

**Description:** Dll1-luciferase expression in coupled muscle stem cells associated with a myofiber, related to Fig. 6c. The fiber was isolated from a TxDll1<sup>f/type2</sup> mouse. Time-lapse imaging of the bioluminescence (left) and bright field (right) signals. The arrows (green) show the cells that were tracked. Images were taken every 10 minutes; the exposure time for the bioluminescence signal was 9 minutes, and for the bright field image 30 milliseconds.

**Title:** Supplementary Movie 6.

**Description:** Nanoluc expression in a sphere formed by TxDll1<sup>f/type2</sup> muscle stem cells, related to Fig. 6d. Time-lapse imaging of a bioluminescence (left) and bright field and GFP (right) signals. Images were taken every 10 minutes; the exposure time for the bioluminescence signal was 5 minutes, and for the bright field image 30 milliseconds.
